# Supplementary material for: Commentary on: Abundance and distribution of microplastics within surface sediments of a key shellfish growing region of Canada
Source: PLoS One. 2019 Dec 11;14(12):e0225945. doi: 10.1371/journal.pone.0225945 (PMC6905569; doi:10.1371/journal.pone.0225945)
Supplement: S1 Dataset — (CSV) [file pone.0225945.s001.csv]

Sample ID	Site	Region	Site Type	Quadrat	Sample Type	Total MP Count (/ind, /kg, /L)	Identification Error (inverse) Based on FTIR	Adjusted MP count
P29	DB	Baynes	Aquaculture	1	Clams	0	7.692307692	0
P12	DB	Baynes	Aquaculture	1	Clams	0	7.692307692	0
P6	DB	Baynes	Aquaculture	1	Clams	3	7.692307692	0.39
P47	DB	Baynes	Aquaculture	1	Clams	1	7.692307692	0.13
P49	DB	Baynes	Aquaculture	5	Clams	3	7.692307692	0.39
P9	DB	Baynes	Aquaculture	3	Clams	5	7.692307692	0.65
P16	DB	Baynes	Aquaculture	3	Clams	2	7.692307692	0.26
P11	DB	Baynes	Aquaculture	5	Clams	10	7.692307692	1.3
P23	DB	Baynes	Aquaculture	5	Clams	3	7.692307692	0.39
P38	DB	Baynes	Aquaculture	3	Clams	0	7.692307692	0
S24	MB	Baynes	Aquaculture	2	Clams	2	7.692307692	0.26
S18	MB	Baynes	Aquaculture	2	Clams	1	7.692307692	0.13
S40	MB	Baynes	Aquaculture	1	Clams	0	7.692307692	0
S53	MB	Baynes	Aquaculture	1	Clams	2	7.692307692	0.26
S31	MB	Baynes	Aquaculture	2	Clams	0	7.692307692	0
S13	MB	Baynes	Aquaculture	2	Clams	2	7.692307692	0.26
S54	MB	Baynes	Aquaculture	2	Clams	2	7.692307692	0.26
S44	MB	Baynes	Aquaculture	1	Clams	0	7.692307692	0
S22	MB	Baynes	Aquaculture	1	Clams	1	7.692307692	0.13
S4	MB	Baynes	Aquaculture	1	Clams	1	7.692307692	0.13
J59	MBREF	Baynes	Non-Aquaculture	2	Clams	1	7.692307692	0.13
J41	MBREF	Baynes	Non-Aquaculture	5	Clams	0	7.692307692	0
J35	MBREF	Baynes	Non-Aquaculture	2	Clams	2	7.692307692	0.26
J16	MBREF	Baynes	Non-Aquaculture	5	Clams	0	7.692307692	0
J49	MBREF	Baynes	Non-Aquaculture	1	Clams	0	7.692307692	0
J22	MBREF	Baynes	Non-Aquaculture	5	Clams	2	7.692307692	0.26
J47	MBREF	Baynes	Non-Aquaculture	5	Clams	0	7.692307692	0
J58	MBREF	Baynes	Non-Aquaculture	4	Clams	1	7.692307692	0.13
J13	MBREF	Baynes	Non-Aquaculture	5	Clams	3	7.692307692	0.39
J44	MBREF	Baynes	Non-Aquaculture	2	Clams	0	7.692307692	0
T36	SP	Baynes	Aquaculture	2	Clams	0	7.692307692	0
T20	SP	Baynes	Aquaculture	2	Clams	0	7.692307692	0
W23	SP	Baynes	Aquaculture	4	Clams	1	7.692307692	0.13
T23	SP	Baynes	Aquaculture	4	Clams	2	7.692307692	0.26
T2	SP	Baynes	Aquaculture	1	Clams	1	7.692307692	0.13
W36	SP	Baynes	Aquaculture	4	Clams	0	7.692307692	0
T40	SP	Baynes	Aquaculture	3	Clams	1	7.692307692	0.13
T38	SP	Baynes	Aquaculture	3	Clams	0	7.692307692	0
W8	SP	Baynes	Aquaculture	2	Clams	1	7.692307692	0.13
W22	SP	Baynes	Aquaculture	3	Clams	1	7.692307692	0.13
K53	SPREF	Baynes	Non-Aquaculture	5	Clams	0	7.692307692	0
K33	SPREF	Baynes	Non-Aquaculture	5	Clams	1	7.692307692	0.13
K28	SPREF	Baynes	Non-Aquaculture	1	Clams	0	7.692307692	0
K36	SPREF	Baynes	Non-Aquaculture	1	Clams	0	7.692307692	0
K55	SPREF	Baynes	Non-Aquaculture	3	Clams	0	7.692307692	0
K56	SPREF	Baynes	Non-Aquaculture	1	Clams	2	7.692307692	0.26
K60	SPREF	Baynes	Non-Aquaculture	3	Clams	3	7.692307692	0.39
K58	SPREF	Baynes	Non-Aquaculture	3	Clams	4	7.692307692	0.52
K1	SPREF	Baynes	Non-Aquaculture	1	Clams	0	7.692307692	0
K38	SPREF	Baynes	Non-Aquaculture	5	Clams	1	7.692307692	0.13
XH39	MB	Baynes	Aquaculture	1	Oysters	1	7.692307692	0.13
XK8	DB	Baynes	Aquaculture	5	Oysters	4	7.692307692	0.52
XK47	DB	Baynes	Aquaculture	5	Oysters	2	7.692307692	0.26
XK7	DB	Baynes	Aquaculture	3	Oysters	2	7.692307692	0.26
XH4	MB	Baynes	Aquaculture	1	Oysters	3	7.692307692	0.39
XH33	MB	Baynes	Aquaculture	3	Oysters	0	7.692307692	0
XJ5	DBREF	Baynes	Non-Aquaculture	1	Oysters	6	7.692307692	0.78
XJ20	DBREF	Baynes	Non-Aquaculture	1	Oysters	2	7.692307692	0.26
XS24	SPREF	Baynes	Non-Aquaculture	1	Oysters	3	7.692307692	0.39
XJ19	DBREF	Baynes	Non-Aquaculture	1	Oysters	2	7.692307692	0.26
XA39	MBREF	Baynes	Non-Aquaculture	5	Oysters	2	7.692307692	0.26
XA40	MBREF	Baynes	Non-Aquaculture	5	Oysters	0	7.692307692	0
XS15	SPREF	Baynes	Non-Aquaculture	1	Oysters	1	7.692307692	0.13
XG14	SP	Baynes	Aquaculture	1	Oysters	0	7.692307692	0
XA12	MBREF	Baynes	Non-Aquaculture	5	Oysters	2	7.692307692	0.26
XS19	SPREF	Baynes	Non-Aquaculture	1	Oysters	1	7.692307692	0.13
XG24	SP	Baynes	Aquaculture	1	Oysters	2	7.692307692	0.26
XG13	SP	Baynes	Aquaculture	1	Oysters	2	7.692307692	0.26
XA38	MBREF	Baynes	Non-Aquaculture	3	Oysters	1	7.692307692	0.13
XA33	MBREF	Baynes	Non-Aquaculture	3	Oysters	2	7.692307692	0.26
XH7	MB	Baynes	Aquaculture	5	Oysters	1	7.692307692	0.13
XA9	MBREF	Baynes	Non-Aquaculture	1	Oysters	4	7.692307692	0.52
XA22	MBREF	Baynes	Non-Aquaculture	1	Oysters	1	7.692307692	0.13
XJ45	DBREF	Baynes	Non-Aquaculture	3	Oysters	2	7.692307692	0.26
XG16	SP	Baynes	Aquaculture	4	Oysters	0	7.692307692	0
XG40	SP	Baynes	Aquaculture	4	Oysters	3	7.692307692	0.39
XJ39	DBREF	Baynes	Non-Aquaculture	5	Oysters	1	7.692307692	0.13
XG42	SP	Baynes	Aquaculture	5	Oysters	1	7.692307692	0.13
XJ16	DBREF	Baynes	Non-Aquaculture	5	Oysters	4	7.692307692	0.52
XK20	DB	Baynes	Aquaculture	5	Oysters	2	7.692307692	0.26
XK21	DB	Baynes	Aquaculture	1	Oysters	3	7.692307692	0.39
XJ17	DBREF	Baynes	Non-Aquaculture	3	Oysters	1	7.692307692	0.13
XH2	MB	Baynes	Aquaculture	5	Oysters	0	7.692307692	0
XS28	SPREF	Baynes	Non-Aquaculture	3	Oysters	0	7.692307692	0
XA28	MBREF	Baynes	Non-Aquaculture	3	Oysters	2	7.692307692	0.26
XJ31	DBREF	Baynes	Non-Aquaculture	5	Oysters	4	7.692307692	0.52
XS9	SPREF	Baynes	Non-Aquaculture	3	Oysters	2	7.692307692	0.26
XH19	MB	Baynes	Aquaculture	5	Oysters	2	7.692307692	0.26
XJ44	DBREF	Baynes	Non-Aquaculture	3	Oysters	3	7.692307692	0.39
XH5	MB	Baynes	Aquaculture	1	Oysters	0	7.692307692	0
XK9	DB	Baynes	Aquaculture	1	Oysters	4	7.692307692	0.52
XJ9	DBREF	Baynes	Non-Aquaculture	3	Oysters	2	7.692307692	0.26
XS39	SPREF	Baynes	Non-Aquaculture	5	Oysters	0	7.692307692	0
XA25	MBREF	Baynes	Non-Aquaculture	1	Oysters	0	7.692307692	0
XK5	DB	Baynes	Aquaculture	1	Oysters	3	7.692307692	0.39
XH35	MB	Baynes	Aquaculture	1	Oysters	1	7.692307692	0.13
XK48	DB	Baynes	Aquaculture	1	Oysters	0	7.692307692	0
XA20	MBREF	Baynes	Non-Aquaculture	1	Oysters	0	7.692307692	0
XS48	SPREF	Baynes	Non-Aquaculture	5	Oysters	2	7.692307692	0.26
XG41	SP	Baynes	Aquaculture	5	Oysters	1	7.692307692	0.13
XG3	SP	Baynes	Aquaculture	1	Oysters	0	7.692307692	0
XS21	SPREF	Baynes	Non-Aquaculture	1	Oysters	1	7.692307692	0.13
XG48	SP	Baynes	Aquaculture	5	Oysters	0	7.692307692	0
XG8	SP	Baynes	Aquaculture	4	Oysters	1	7.692307692	0.13
XS22	SPREF	Baynes	Non-Aquaculture	5	Oysters	0	7.692307692	0
XS20	SPREF	Baynes	Non-Aquaculture	3	Oysters	1	7.692307692	0.13
XH32	MB	Baynes	Aquaculture	3	Oysters	4	7.692307692	0.52
XK13	DB	Baynes	Aquaculture	3	Oysters	1	7.692307692	0.13
XH25	MB	Baynes	Aquaculture	3	Oysters	7	7.692307692	0.91
XK31	DB	Baynes	Aquaculture	3	Oysters	0	7.692307692	0
JWDB1	DB	Baynes	Aquaculture	1	Water	12	7.692307692	1.56
JWDB3	DB	Baynes	Aquaculture	3	Water	2	7.692307692	0.26
JWDB5	DB	Baynes	Aquaculture	5	Water	4	7.692307692	0.52
JWDBREF1	DBREF	Baynes	Non-Aquaculture	1	Water	0	7.692307692	0
JWDBREF3	DBREF	Baynes	Non-Aquaculture	3	Water	1	7.692307692	0.13
JWDBREF5	DBREF	Baynes	Non-Aquaculture	5	Water	2	7.692307692	0.26
JWMB1	MB	Baynes	Aquaculture	1	Water	6	7.692307692	0.78
JWMB3	MB	Baynes	Aquaculture	3	Water	3	7.692307692	0.39
JWMB5	MB	Baynes	Aquaculture	5	Water	4	7.692307692	0.52
JWMBREF1	MBREF	Baynes	Non-Aquaculture	1	Water	8	7.692307692	1.04
JWMBREF3	MBREF	Baynes	Non-Aquaculture	3	Water	15	7.692307692	1.95
JWMBREF5	MBREF	Baynes	Non-Aquaculture	5	Water	8	7.692307692	1.04
JWSP1	SP	Baynes	Aquaculture	1	Water	9	7.692307692	1.17
JWSP3	SP	Baynes	Aquaculture	3	Water	3	7.692307692	0.39
JWSP5	SP	Baynes	Aquaculture	5	Water	2	7.692307692	0.26
JWSPREF1	SPREF	Baynes	Non-Aquaculture	1	Water	2	7.692307692	0.26
JWSPREF3	SPREF	Baynes	Non-Aquaculture	3	Water	10	7.692307692	1.3
JWSPREF5	SPREF	Baynes	Non-Aquaculture	5	Water	4	7.692307692	0.52
S45	DB	Baynes	Aquaculture	5	Sediment	82.85862248	7.692307692	10.77162092
S45	DB	Baynes	Aquaculture	5	Sediment	74.22527371	7.692307692	9.649285582
S43	DB	Baynes	Aquaculture	1	Sediment	54.16017873	7.692307692	7.040823235
S43	DB	Baynes	Aquaculture	1	Sediment	40.37345445	7.692307692	5.248549079
S40	DB	Baynes	Aquaculture	1	Sediment	108.3203575	7.692307692	14.08164647
S40	DB	Baynes	Aquaculture	1	Sediment	80.74690891	7.692307692	10.49709816
S42	DB	Baynes	Aquaculture	5	Sediment	82.85862248	7.692307692	10.77162092
S42	DB	Baynes	Aquaculture	5	Sediment	74.22527371	7.692307692	9.649285582
S41	DB	Baynes	Aquaculture	3	Sediment	137.8043179	7.692307692	17.91456132
S41	DB	Baynes	Aquaculture	3	Sediment	98.75730393	7.692307692	12.83844951
S30	MB	Baynes	Aquaculture	5	Sediment	201.3338367	7.692307692	26.17339877
S30	MB	Baynes	Aquaculture	5	Sediment	138.8949173	7.692307692	18.05633925
S14	SP	Baynes	Aquaculture	3	Sediment	63.52231221	7.692307692	8.257900588
S14	SP	Baynes	Aquaculture	3	Sediment	60.33182504	7.692307692	7.843137255
S44	DB	Baynes	Aquaculture	3	Sediment	413.4129536	7.692307692	53.74368397
S44	DB	Baynes	Aquaculture	3	Sediment	296.2719118	7.692307692	38.51534853
S13	SP	Baynes	Aquaculture	1	Sediment	0	7.692307692	0
S13	SP	Baynes	Aquaculture	1	Sediment	0	7.692307692	0
S28	MB	Baynes	Aquaculture	1	Sediment	139.5998139	7.692307692	18.1479758
S28	MB	Baynes	Aquaculture	1	Sediment	114.9535396	7.692307692	14.94396015
S18	SP	Baynes	Aquaculture	5	Sediment	137.8676471	7.692307692	17.92279412
S18	SP	Baynes	Aquaculture	5	Sediment	273.8475582	7.692307692	35.60018257
S29	MB	Baynes	Aquaculture	3	Sediment	222.9654404	7.692307692	28.98550725
S29	MB	Baynes	Aquaculture	3	Sediment	159.6615176	7.692307692	20.75599729
S32	MB	Baynes	Aquaculture	3	Sediment	178.3723523	7.692307692	23.1884058
S32	MB	Baynes	Aquaculture	3	Sediment	127.7292141	7.692307692	16.60479783
S31	MB	Baynes	Aquaculture	1	Sediment	186.1330852	7.692307692	24.19730107
S31	MB	Baynes	Aquaculture	1	Sediment	153.2713861	7.692307692	19.9252802
S33	MB	Baynes	Aquaculture	5	Sediment	151.0003775	7.692307692	19.63004908
S33	MB	Baynes	Aquaculture	5	Sediment	104.171188	7.692307692	13.54225444
S16	SP	Baynes	Aquaculture	1	Sediment	268.8397883	7.692307692	34.94917248
S16	SP	Baynes	Aquaculture	1	Sediment	309.9874068	7.692307692	40.29836288
S15	SP	Baynes	Aquaculture	5	Sediment	45.95588235	7.692307692	5.974264706
S15	SP	Baynes	Aquaculture	5	Sediment	91.2825194	7.692307692	11.86672752
S37	MBREF	Baynes	Non-Aquaculture	1	Sediment	42.95302013	7.692307692	5.583892617
S37	MBREF	Baynes	Non-Aquaculture	1	Sediment	42.33476213	7.692307692	5.503519077
S39	MBREF	Baynes	Non-Aquaculture	5	Sediment	582.7081361	7.692307692	75.75205769
S39	MBREF	Baynes	Non-Aquaculture	5	Sediment	358.6639767	7.692307692	46.62631697
S17	SP	Baynes	Aquaculture	3	Sediment	254.0892488	7.692307692	33.03160235
S17	SP	Baynes	Aquaculture	3	Sediment	241.3273002	7.692307692	31.37254902
S75	MBREF	Baynes	Non-Aquaculture	3	Sediment	42.70994608	7.692307692	5.55229299
S75	MBREF	Baynes	Non-Aquaculture	3	Sediment	34.55126544	7.692307692	4.491664507
S83	SPREF	Baynes	Non-Aquaculture	3	Sediment	39.75747938	7.692307692	5.168472319
S83	SPREF	Baynes	Non-Aquaculture	3	Sediment	47.37652493	7.692307692	6.158948241
S34	SPREF	Baynes	Non-Aquaculture	3	Sediment	119.2724381	7.692307692	15.50541696
S34	SPREF	Baynes	Non-Aquaculture	3	Sediment	142.1295748	7.692307692	18.47684472
S88	DBREF	Baynes	Non-Aquaculture	5	Sediment	36.01656762	7.692307692	4.682153791
S88	DBREF	Baynes	Non-Aquaculture	5	Sediment	31.83319406	7.692307692	4.138315228
S303	SPREF	Baynes	Non-Aquaculture	1	Sediment	85.82770089	7.692307692	11.15760112
S303	SPREF	Baynes	Non-Aquaculture	1	Sediment	75.58578987	7.692307692	9.826152683
S59	SPREF	Baynes	Non-Aquaculture	1	Sediment	557.8800558	7.692307692	72.52440725
S59	SPREF	Baynes	Non-Aquaculture	1	Sediment	491.3076342	7.692307692	63.86999244
S90	MBREF	Baynes	Non-Aquaculture	1	Sediment	128.8590604	7.692307692	16.75167785
S90	MBREF	Baynes	Non-Aquaculture	1	Sediment	127.0042864	7.692307692	16.51055723
S82	DBREF	Baynes	Non-Aquaculture	3	Sediment	32.13754871	7.692307692	4.177881332
S82	DBREF	Baynes	Non-Aquaculture	3	Sediment	40.13445041	7.692307692	5.217478553
S53	MBREF	Baynes	Non-Aquaculture	3	Sediment	298.9696226	7.692307692	38.86605093
S53	MBREF	Baynes	Non-Aquaculture	3	Sediment	241.8588581	7.692307692	31.44165155
S96	SPREF	Baynes	Non-Aquaculture	5	Sediment	118.229513	7.692307692	15.3698367
S96	SPREF	Baynes	Non-Aquaculture	5	Sediment	119.5725282	7.692307692	15.54442867
S52	DBREF	Baynes	Non-Aquaculture	1	Sediment	106.3264221	7.692307692	13.82243488
S52	DBREF	Baynes	Non-Aquaculture	1	Sediment	108.6218601	7.692307692	14.12084182
S45	SPREF	Baynes	Non-Aquaculture	1	Sediment	42.91385045	7.692307692	5.578800558
S45	SPREF	Baynes	Non-Aquaculture	1	Sediment	37.79289494	7.692307692	4.913076342
S79	DBREF	Baynes	Non-Aquaculture	5	Sediment	72.03313524	7.692307692	9.364307581
S79	DBREF	Baynes	Non-Aquaculture	5	Sediment	63.66638813	7.692307692	8.276630456
S68	DBREF	Baynes	Non-Aquaculture	3	Sediment	64.27509742	7.692307692	8.355762664
S68	DBREF	Baynes	Non-Aquaculture	3	Sediment	80.26890082	7.692307692	10.43495711
S49	MBREF	Baynes	Non-Aquaculture	5	Sediment	0	7.692307692	0
S49	MBREF	Baynes	Non-Aquaculture	5	Sediment	0	7.692307692	0
S81	DBREF	Baynes	Non-Aquaculture	1	Sediment	35.44214071	7.692307692	4.607478292
S81	DBREF	Baynes	Non-Aquaculture	1	Sediment	36.20728672	7.692307692	4.706947273
